# Supplementary material for: Targeted Long-Read Sequencing Decodes the Transcriptional Atlas of the Founding RAS Gene Family Members
Source: MDPI journal article supplement (doi:10.3390/ijms222413298), 2021-12-10
Supplement: s1 [file s1]

**Table S1.** List of the human cell lines that were propagated for the present work. All cell lines were cultured based on the American Type Culture Collection (ATCC) guidelines.

| No | Human tissue/type of malignancy | Human Cell lines                                      |
|----|---------------------------------|-------------------------------------------------------|
| 1  | Breast cancer                   | MCF-7, BT-20, SK-BR-3, MDA-MB-231, MDA-MB-468, BT-474 |
| 2  | Ovarian cancer                  | ES-2, SK-OV-3, OVCAR-3, MDAH-2774                     |
| 3  | Prostate cancer                 | PC-3, DU 145, LNCaP                                   |
| 4  | Colorectal cancer               | DLD-1, HT-29, Caco-2, HCT 116, SW620                  |
| 5  | Urinary bladder cancer          | RT4, T24                                              |
| 6  | Liver cancer                    | Hep G2, HuH-7                                         |
| 7  | Lung cancer                     | A549                                                  |
| 8  | Cervical cancer                 | HeLa, SiHa                                            |
| 9  | Brain cancer                    | SH-SY5Y, H4, U-87 MG, U-251 MG                        |
| 10 | Haematological malignancies     | Raji, SU-DHL-1, HL-60                                 |
| 11 | Gastric cancer                  | AGS                                                   |
| 12 | Endometrial cancer              | Ishikawa, SK-UT-1B                                    |
| 13 | Renal cell cancer               | 786-O, Caki-1                                         |
| 14 | Non-cancerous cell lines        | HEK-293, HaCaT, BJ                                    |
